# Supplementary material for: Stepwise addition of CuNCS onto [Et4N][Tp*WS3]: Design, syntheses, structures and third-order nonlinear optical properties
Source: Royal Society of Chemistry journal article supplement (doi:10.1039/b822858b), 2009-01-01
Supplement: b822858b.pdf [file b822858b.pdf]

## Supporting Information

### Stepwise Addition of CuNCS onto [Et<sub>4</sub>N][Tp\*WS<sub>3</sub>]: Design, Syntheses, Structures and Third-Order Nonlinear Optical Properties

Zhen-Hong Wei,<sup>†</sup> Hong-Xi Li,<sup>†</sup> Zhi-Gang Ren,<sup>†</sup> Jian-Ping Lang,<sup>\*,†,‡</sup> Yong Zhang<sup>†</sup> and Zhen-Rong Sun<sup>\*,§</sup>

<sup>†</sup> College of Chemistry, Chemical Engineering and Materials Science, Suzhou University, Suzhou 215123, People's Republic of China

<sup>‡</sup> State Key Laboratory of Organometallic Chemistry, Shanghai Institute of Organic Chemistry, Chinese Academy of Sciences, Shanghai 200032, People's Republic of China

<sup>§</sup>State Key Laboratory of Precision Spectroscopy, and Department of Physics, East China Normal University, Shanghai 200062, People's Republic of China

## Table of Contents

**Figure S1.** View of the 2D network of **5** viewed along the *c* axis. The red and lake blue balls represent the [Tp\*WS<sub>4</sub>Cu<sub>3</sub>] cores and the [Cu(NCS)<sub>4</sub>] units. The yellow sticks represent the connections provided by the NCS groups.**5** looking down the *c* axis. All the hydrogen atoms were omitted.....S3

**Figure S2.** Z-scan data of a  $2.33 \times 10^{-3}$  M DMF of **2** at 800 nm. (a) The data were evaluated under the open aperture configuration. (b) The data were assessed by dividing the normalized Z-scan data obtained under the closed aperture by the normalized Z-scan data in (a). The black squares are the experimental data, and the solid curve is the theoretical fit. ....S3

**Figure S3.** Z-scan data of  $1.12 \times 10^{-3}$  M DMF of **4** at 800 nm. (a) The data were evaluated under the open aperture configuration. (b) The data were assessed by dividing the normalized Z-scan data obtained under the closed aperture by the normalized Z-scan data in (a). The black dots are the experimental data, and the solid curve is the theoretical fit. ....S4

**Figure S4.** Z-scan data of  $1.03 \times 10^{-3}$  M MeCN of **5** at 532 nm. (a) The data were evaluated under the open aperture configuration. (b) The data were assessed by dividing the normalized Z-scan data obtained under the closed aperture by the normalized Z-scan data in (a). The black dots are the experimental data, and the solid curve is the theoretical fit.....S4

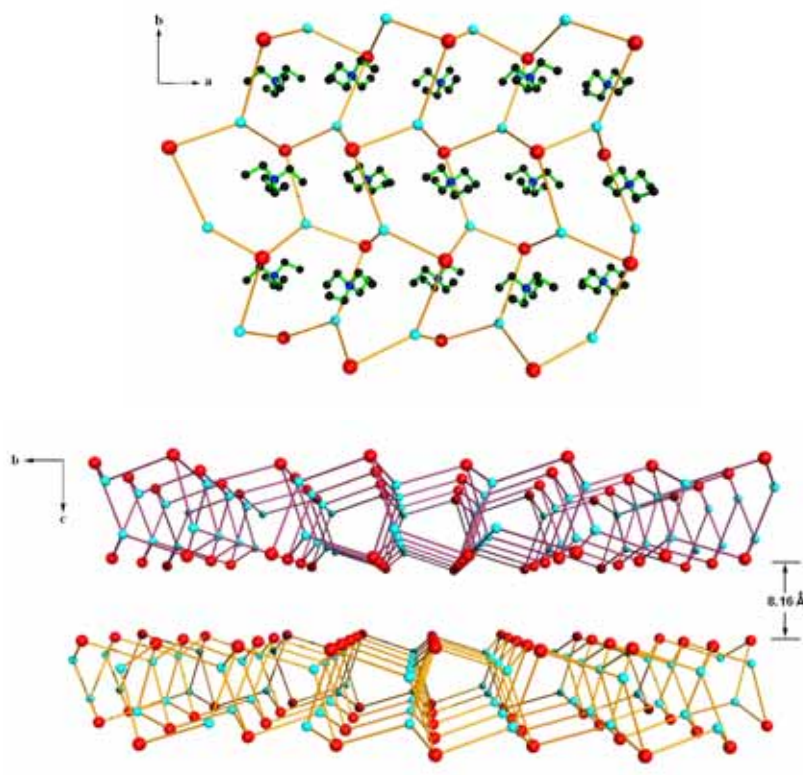

**Figure S1.** View of the 2D network of **5** viewed along the *c* axis. The red and lake blue balls represent the [Tp\*WS<sub>4</sub>Cu<sub>3</sub>] cores and the [Cu(NCS)<sub>4</sub>] units. The yellow sticks represent the connections provided by the NCS groups. **5** looking down the *c* axis. All the hydrogen atoms were omitted.

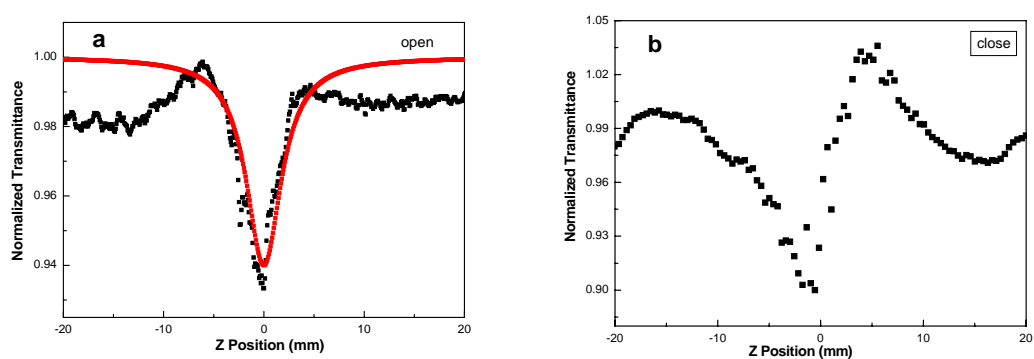

**Figure S2.** Z-scan data of a  $2.33 \times 10^{-3}$  M DMF of **2** at 800 nm. (a) The data were evaluated under the open aperture configuration. (b) The data were assessed by dividing the normalized Z-scan data obtained under the closed aperture by the normalized Z-scan data in (a). The black squares are the experimental data, and the solid curve is the theoretical fit.

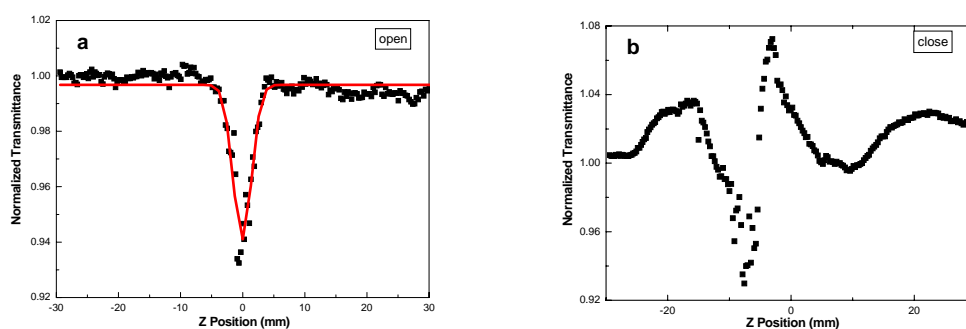

**Figure S3.** Z-scan data of  $1.12 \times 10^{-3}$  M DMF of **4** at 800 nm. (a) The data were evaluated under the open aperture configuration. (b) The data were assessed by dividing the normalized Z-scan data obtained under the closed aperture by the normalized Z-scan data in (a). The black dots are the experimental data, and the solid curve is the theoretical fit.

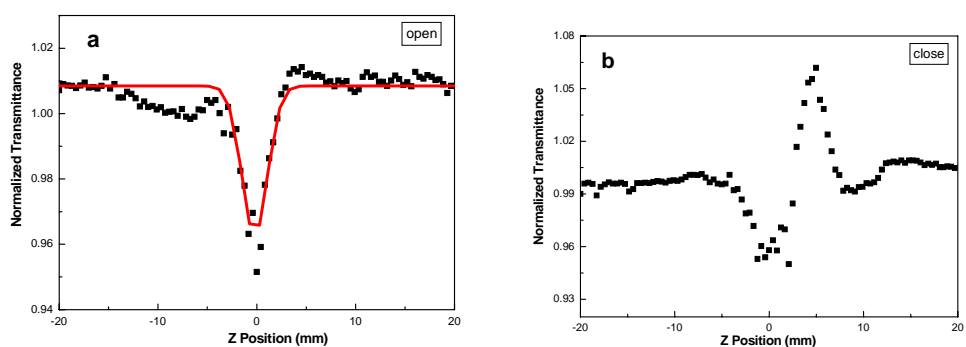

**Figure S4.** Z-scan data of  $1.03 \times 10^{-3}$  M MeCN of **5** at 532 nm. (a) The data were evaluated under the open aperture configuration. (b) The data were assessed by dividing the normalized Z-scan data obtained under the closed aperture by the normalized Z-scan data in (a). The black dots are the experimental data, and the solid curve is the theoretical fit.
